# Supplementary material for: Pressure Overload by Transverse Aortic Constriction Induces Maladaptive Hypertrophy in a Titin-Truncated Mouse Model
Source: Hindawi journal article supplement (doi:10.1155/2015/163564), 2015-01-01
Supplement: f1 [file 163564.f1.pdf]

**Echocardiographic Left Ventricular data from Titin WT and Het TAC bar**  
2 weeks after TAC

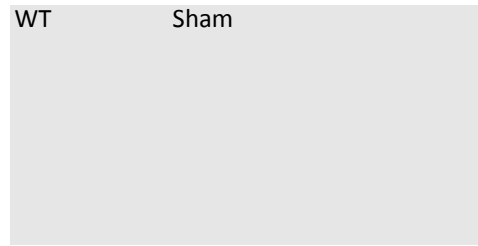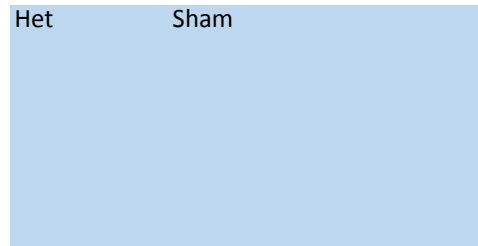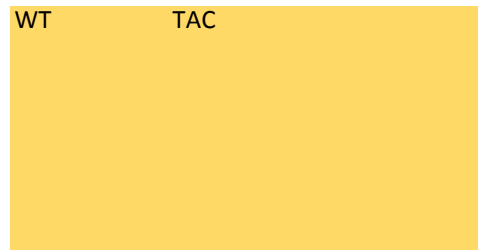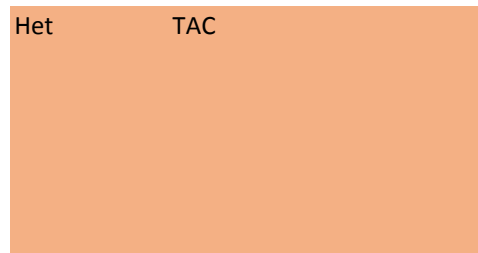

p values

**aged and sham mice**

|          | Weight<br>gm | HR<br>BPM | IVS;d | LVID;d | LVPW;d | IVS;s |
|----------|--------------|-----------|-------|--------|--------|-------|
| Mean     | 31.1         | 420       | 1.04  | 4.38   | 0.85   | 1.54  |
| SD       | 2.28         | 56        | 0.14  | 0.21   | 0.13   | 0.25  |
| Max      | 33.2         | 469       | 1.21  | 4.74   | 1.07   | 1.95  |
| Median   | 31.6         | 438       | 1.07  | 4.29   | 0.80   | 1.49  |
| Min      | 27.4         | 341       | 0.88  | 4.23   | 0.76   | 1.28  |
| Mean+2SD | 35.6         | 531       | 1.32  | 4.80   | 1.10   | 2.04  |
| Mean-2SD | 26.5         | 308       | 0.76  | 3.96   | 0.59   | 1.05  |

|          | gm   | BPM |      |      |      |      |
|----------|------|-----|------|------|------|------|
| Mean     | 31.9 | 406 | 1.07 | 4.33 | 0.96 | 1.58 |
| SD       | 2.63 | 34  | 0.14 | 0.45 | 0.20 | 0.24 |
| Max      | 36.0 | 443 | 1.20 | 4.85 | 1.26 | 1.86 |
| Median   | 31.7 | 417 | 1.11 | 4.39 | 0.94 | 1.67 |
| Min      | 28.6 | 331 | 0.76 | 3.60 | 0.66 | 1.13 |
| Mean+2SD | 37.1 | 473 | 1.35 | 5.23 | 1.37 | 2.06 |
| Mean-2SD | 26.6 | 338 | 0.80 | 3.42 | 0.55 | 1.10 |

|          | gm   | BPM |      |      |      |      |
|----------|------|-----|------|------|------|------|
| Mean     | 31.4 | 417 | 1.18 | 4.15 | 1.03 | 1.50 |
| SD       | 2.35 | 46  | 0.17 | 0.47 | 0.10 | 0.17 |
| Max      | 35.2 | 470 | 1.41 | 4.69 | 1.21 | 1.78 |
| Median   | 31.2 | 422 | 1.18 | 4.31 | 1.02 | 1.46 |
| Min      | 28.5 | 342 | 0.98 | 3.27 | 0.91 | 1.33 |
| Mean+2SD | 36.1 | 508 | 1.51 | 5.10 | 1.23 | 1.85 |
| Mean-2SD | 26.7 | 326 | 0.84 | 3.20 | 0.82 | 1.16 |

|          | gm   | BPM |      |      |      |      |
|----------|------|-----|------|------|------|------|
| Mean     | 30.3 | 458 | 1.10 | 4.59 | 1.08 | 1.48 |
| SD       | 2.20 | 26  | 0.11 | 0.41 | 0.15 | 0.15 |
| Max      | 32.0 | 494 | 1.28 | 5.40 | 1.26 | 1.67 |
| Median   | 31.4 | 462 | 1.06 | 4.48 | 1.11 | 1.48 |
| Min      | 26.7 | 424 | 0.97 | 4.31 | 0.87 | 1.29 |
| Mean+2SD | 34.7 | 509 | 1.32 | 5.40 | 1.38 | 1.78 |
| Mean-2SD | 25.9 | 407 | 0.87 | 3.78 | 0.79 | 1.18 |

|                |      |      |      |      |      |      |
|----------------|------|------|------|------|------|------|
| Baseline; WT \ | 0.58 | 0.57 | 0.69 | 0.83 | 0.30 | 0.78 |
| WT; Sham vs 1  | 0.82 | 0.93 | 0.18 | 0.35 | 0.02 | 0.76 |
| Het; Sham vs 1 | 0.25 | 0.01 | 0.74 | 0.29 | 0.23 | 0.40 |
| TAC; WT vs He  | 0.40 | 0.08 | 0.35 | 0.11 | 0.43 | 0.82 |

| LVID;s | LVPW;s | %LVPW thick | % IVS thick | FS %  | LVD Mass | Mar |
|--------|--------|-------------|-------------|-------|----------|-----|
| 3.14   | 1.22   | 0.94        | 45.1        | 49.3  | 28.3     | 172 |
| 0.48   | 0.23   | 0.07        | 25.30       | 25.10 | 9.68     | 25  |
| 3.49   | 1.43   | 1.01        | 74.7        | 82.2  | 44.0     | 209 |
| 3.37   | 1.36   | 0.95        | 33.6        | 39.1  | 26.4     | 171 |
| 2.37   | 0.96   | 0.84        | 21.0        | 25.6  | 20.1     | 141 |
| 4.10   | 1.69   | 1.08        | 95.7        | 99.5  | 47.7     | 223 |
| 2.19   | 0.76   | 0.81        | -5.5        | -0.9  | 9.0      | 121 |

|      |      |      |       |       |      |     |
|------|------|------|-------|-------|------|-----|
| 3.04 | 1.30 | 1.02 | 37.5  | 47.3  | 30.5 | 188 |
| 0.63 | 0.23 | 0.16 | 20.69 | 12.60 | 8.19 | 50  |
| 4.06 | 1.54 | 1.23 | 70.0  | 67.6  | 44.7 | 292 |
| 3.10 | 1.33 | 1.02 | 35.8  | 46.4  | 30.4 | 185 |
| 1.99 | 0.89 | 0.71 | 11.0  | 24.5  | 15.9 | 127 |
| 4.30 | 1.77 | 1.34 | 78.8  | 72.5  | 46.9 | 289 |
| 1.77 | 0.83 | 0.70 | -3.9  | 22.1  | 14.1 | 87  |

|      |      |      |       |      |      |     |
|------|------|------|-------|------|------|-----|
| 3.02 | 1.46 | 1.10 | 42.2  | 28.5 | 28.0 | 197 |
| 0.67 | 0.25 | 0.11 | 19.54 | 7.49 | 9.66 | 41  |
| 3.57 | 1.74 | 1.23 | 78.1  | 39.8 | 47.7 | 257 |
| 3.22 | 1.43 | 1.10 | 40.2  | 29.1 | 23.9 | 176 |
| 1.71 | 1.13 | 0.97 | 24.2  | 17.7 | 19.3 | 152 |
| 4.36 | 1.95 | 1.32 | 81.2  | 43.5 | 47.4 | 278 |
| 1.68 | 0.97 | 0.88 | 3.1   | 13.6 | 8.7  | 115 |

|      |      |      |      |       |      |     |
|------|------|------|------|-------|------|-----|
| 3.77 | 1.31 | 1.09 | 21.5 | 36.5  | 17.6 | 226 |
| 0.24 | 0.16 | 0.09 | 8.81 | 20.61 | 4.09 | 30  |
| 4.17 | 1.51 | 1.22 | 32.5 | 72.2  | 22.8 | 268 |
| 3.72 | 1.34 | 1.12 | 21.2 | 33.4  | 18.3 | 227 |
| 3.58 | 1.11 | 0.96 | 8.7  | 10.3  | 11.5 | 179 |
| 4.24 | 1.64 | 1.27 | 39.1 | 77.7  | 25.8 | 285 |
| 3.30 | 0.98 | 0.91 | 3.9  | -4.7  | 9.4  | 166 |

|      |      |      |      |      |      |      |
|------|------|------|------|------|------|------|
| 0.76 | 0.58 | 0.36 | 0.56 | 0.85 | 0.68 | 0.52 |
| 0.74 | 0.12 | 0.02 | 0.82 | 0.06 | 0.96 | 0.26 |
| 0.02 | 0.91 | 0.33 | 0.10 | 0.24 | 0.00 | 0.13 |
| 0.03 | 0.23 | 0.84 | 0.04 | 0.36 | 0.03 | 0.18 |

LVs Mass Man LV masses diff LVwtd / Bdy Wt

ESV teich

EF teich

SV teich

|     |      |      |    |     |    |
|-----|------|------|----|-----|----|
| 183 | 10%  | 5.5  | 40 | 54% | 47 |
| 14  | 12%  | 0.72 | 13 | 14% | 11 |
| 207 | 29%  | 6.6  | 51 | 76% | 60 |
| 181 | 4%   | 5.2  | 46 | 52% | 48 |
| 173 | 1%   | 4.9  | 20 | 41% | 35 |
| 211 | 34%  | 7.0  | 67 | 82% | 69 |
| 156 | -14% | 4.1  | 14 | 26% | 24 |

|     |     |      |    |     |    |
|-----|-----|------|----|-----|----|
| 189 | 9%  | 5.8  | 38 | 57% | 47 |
| 43  | 6%  | 1.15 | 18 | 12% | 8  |
| 264 | 18% | 8.1  | 73 | 77% | 64 |
| 193 | 10% | 5.7  | 38 | 58% | 47 |
| 137 | 0%  | 4.3  | 13 | 34% | 37 |
| 275 | 21% | 8.1  | 75 | 82% | 64 |
| 104 | -3% | 3.5  | 2  | 33% | 31 |

|     |     |      |    |     |    |
|-----|-----|------|----|-----|----|
| 199 | 5%  | 6.3  | 38 | 54% | 40 |
| 50  | 4%  | 1.27 | 16 | 14% | 6  |
| 262 | 13% | 7.9  | 53 | 80% | 49 |
| 179 | 4%  | 6.2  | 42 | 48% | 40 |
| 133 | 1%  | 4.3  | 9  | 40% | 33 |
| 300 | 13% | 8.8  | 71 | 81% | 51 |
| 99  | -3% | 3.7  | 5  | 26% | 28 |

|     |     |      |    |     |    |
|-----|-----|------|----|-----|----|
| 244 | 9%  | 7.5  | 61 | 37% | 37 |
| 43  | 6%  | 1.45 | 9  | 7%  | 15 |
| 308 | 18% | 10.1 | 77 | 45% | 64 |
| 241 | 9%  | 7.4  | 59 | 38% | 33 |
| 186 | 3%  | 5.7  | 54 | 25% | 21 |
| 329 | 22% | 10.4 | 80 | 51% | 66 |
| 159 | -3% | 4.6  | 43 | 22% | 7  |

|      |      |      |      |      |      |      |
|------|------|------|------|------|------|------|
| 0.77 | 0.79 | 0.60 | 0.46 | 0.83 | 0.64 | 0.89 |
| 0.51 | 0.32 | 0.26 | 0.27 | 0.81 | 0.97 | 0.19 |
| 0.04 | 0.82 | 0.03 | 0.43 | 0.02 | 0.00 | 0.11 |
| 0.11 | 0.17 | 0.13 | 0.53 | 0.01 | 0.02 | 0.61 |

| EDV teich | CO teich | LV mass / LVIC h/r | HR<br>BPM | VTI<br>cm | Peak Vel<br>mm/s |      |
|-----------|----------|--------------------|-----------|-----------|------------------|------|
| 87        | 19.7     | 39.2               | 0.43      | 420       | 4.0              | 1011 |
| 10        | 5.97     | 4.36               | 0.03      | 53        | 1.00             | 237  |
| 104       | 28.2     | 44.1               | 0.47      | 466       | 5.5              | 1319 |
| 83        | 20.7     | 39.1               | 0.43      | 436       | 3.7              | 951  |
| 80        | 12.2     | 32.9               | 0.39      | 340       | 3.0              | 719  |
| 107       | 31.6     | 47.9               | 0.49      | 526       | 6.0              | 1484 |
| 67        | 7.7      | 30.4               | 0.37      | 315       | 2.0              | 538  |

|     |      |      | Doppler data |     |      |      |
|-----|------|------|--------------|-----|------|------|
|     |      |      | BPM          | cm  | mm/s |      |
| 86  | 19.3 | 43.3 | 0.48         | 401 | 4.6  | 1126 |
| 20  | 4.08 | 9.38 | 0.10         | 36  | 1.66 | 461  |
| 110 | 26.6 | 60.2 | 0.64         | 436 | 7.2  | 2060 |
| 87  | 19.2 | 42.9 | 0.50         | 408 | 3.7  | 1015 |
| 54  | 12.1 | 27.7 | 0.31         | 321 | 3.1  | 647  |
| 126 | 27.4 | 62.1 | 0.67         | 472 | 7.9  | 2048 |
| 45  | 11.1 | 24.6 | 0.28         | 330 | 1.2  | 204  |

|     |      |      | BPM  | cm  | mm/s |      |
|-----|------|------|------|-----|------|------|
| 78  | 16.5 | 47.2 | 0.54 | 400 | 4.3  | 901  |
| 20  | 2.69 | 6.76 | 0.10 | 46  | 0.70 | 172  |
| 102 | 20.5 | 57.3 | 0.72 | 452 | 5.4  | 1085 |
| 84  | 15.8 | 46.6 | 0.54 | 405 | 4.4  | 950  |
| 43  | 12.9 | 40.2 | 0.44 | 320 | 3.5  | 610  |
| 117 | 21.9 | 60.7 | 0.74 | 493 | 5.7  | 1246 |
| 39  | 11.2 | 33.7 | 0.34 | 308 | 3.0  | 556  |

|     |      |      | BPM  | cm  | mm/s |     |
|-----|------|------|------|-----|------|-----|
| 98  | 16.6 | 49.2 | 0.48 | 456 | 2.4  | 533 |
| 22  | 6.22 | 4.98 | 0.07 | 24  | 0.65 | 104 |
| 141 | 27.8 | 55.5 | 0.56 | 487 | 3.1  | 648 |
| 91  | 16.1 | 49.7 | 0.49 | 458 | 2.3  | 538 |
| 84  | 9.9  | 40.2 | 0.38 | 419 | 1.8  | 396 |
| 141 | 29.1 | 59.1 | 0.61 | 505 | 3.7  | 740 |
| 54  | 4.2  | 39.2 | 0.35 | 408 | 1.1  | 326 |

|      |      |      |      |      |      |      |
|------|------|------|------|------|------|------|
| 0.90 | 0.89 | 0.37 | 0.36 | 0.45 | 0.50 | 0.62 |
| 0.37 | 0.24 | 0.04 | 0.04 | 0.52 | 0.50 | 0.39 |
| 0.30 | 0.35 | 0.19 | 0.95 | 0.01 | 0.01 | 0.01 |
| 0.11 | 0.97 | 0.57 | 0.24 | 0.03 | 0.00 | 0.00 |

| Ao Diameter<br>mm | SV<br>ml | CO<br>ml/min | VTI<br>cm | Peak Vel<br>mm/s | PA Diameter<br>mm |      |
|-------------------|----------|--------------|-----------|------------------|-------------------|------|
| 1.5               | 0.07     | 30.7         |           | 3.1              | 687.4             | 1.1  |
| 0.11              | 0.02     | 9.73         |           | 0.80             | 123.77            | 0.18 |
| 1.7               | 0.11     | 46.6         |           | 4.5              | 877.8             | 1.3  |
| 1.6               | 0.07     | 26.7         |           | 2.9              | 658.7             | 1.1  |
| 1.4               | 0.05     | 22.6         |           | 2.5              | 540.8             | 0.9  |
| 1.8               | 0.12     | 50.1         |           | 4.7              | 934.9             | 1.5  |
| 1.3               | 0.03     | 11.2         |           | 1.5              | 439.8             | 0.7  |

| mm   | ml   | ml/min | cm | mm/s | mm    |      |
|------|------|--------|----|------|-------|------|
| 1.5  | 0.08 | 33.9   |    | 3.1  | 694.1 | 1.1  |
| 0.14 | 0.03 | 13.48  |    | 0.52 | 99.76 | 0.15 |
| 1.7  | 0.16 | 60.6   |    | 4.0  | 871.8 | 1.5  |
| 1.5  | 0.07 | 28.1   |    | 3.1  | 692.7 | 1.1  |
| 1.4  | 0.05 | 21.2   |    | 2.4  | 578.5 | 1.0  |
| 1.8  | 0.15 | 60.8   |    | 4.1  | 893.6 | 1.4  |
| 1.3  | 0.02 | 6.9    |    | 2.0  | 494.6 | 0.8  |

| mm   | ml    | ml/min | cm | mm/s | mm    |      |
|------|-------|--------|----|------|-------|------|
| 1.7  | 0.11  | 42.4   |    | 2.6  | 618.2 | 1.2  |
| 0.30 | 0.06  | 23.93  |    | 0.40 | 94.21 | 0.14 |
| 2.2  | 0.21  | 87.5   |    | 3.2  | 719.5 | 1.4  |
| 1.6  | 0.10  | 34.4   |    | 2.6  | 628.9 | 1.2  |
| 1.3  | 0.05  | 18.9   |    | 2.2  | 460.8 | 1.0  |
| 2.3  | 0.22  | 90.2   |    | 3.4  | 806.6 | 1.5  |
| 1.1  | -0.01 | -5.5   |    | 1.8  | 429.8 | 0.9  |

| mm   | ml   | ml/min | cm | mm/s | mm    |      |
|------|------|--------|----|------|-------|------|
| 1.8  | 0.06 | 27.3   |    | 2.1  | 544.9 | 1.3  |
| 0.18 | 0.02 | 11.09  |    | 0.34 | 94.13 | 0.24 |
| 2.0  | 0.09 | 44.7   |    | 2.6  | 638.7 | 1.6  |
| 1.8  | 0.06 | 24.3   |    | 2.0  | 564.0 | 1.2  |
| 1.5  | 0.03 | 15.5   |    | 1.7  | 407.4 | 1.0  |
| 2.1  | 0.11 | 49.5   |    | 2.8  | 733.1 | 1.8  |
| 1.4  | 0.01 | 5.1    |    | 1.4  | 356.6 | 0.8  |

|      |      |      |  |      |      |      |
|------|------|------|--|------|------|------|
| 0.88 | 0.53 | 0.66 |  | 0.87 | 0.92 | 0.90 |
| 0.25 | 0.26 | 0.33 |  | 0.20 | 0.32 | 0.45 |
| 0.02 | 0.15 | 0.35 |  | 0.00 | 0.02 | 0.11 |
| 0.63 | 0.09 | 0.19 |  | 0.03 | 0.21 | 0.43 |

| SV<br>ml | CO<br>ml/min |
|----------|--------------|
| 0.0      | 12.7         |
| 0.01     | 4.12         |
| 0.0      | 18.0         |
| 0.0      | 11.2         |
| 0.0      | 8.7          |
| 0.1      | 20.9         |
| 0.0      | 4.4          |

| ml   | ml/min |
|------|--------|
| 0.0  | 11.9   |
| 0.01 | 3.79   |
| 0.1  | 17.9   |
| 0.0  | 11.6   |
| 0.0  | 7.4    |
| 0.1  | 19.4   |
| 0.0  | 4.3    |

| ml   | ml/min |
|------|--------|
| 0.0  | 11.7   |
| 0.01 | 3.15   |
| 0.0  | 16.5   |
| 0.0  | 10.1   |
| 0.0  | 9.1    |
| 0.0  | 18.0   |
| 0.0  | 5.4    |

| ml   | ml/min |
|------|--------|
| 0.0  | 12.2   |
| 0.01 | 3.56   |
| 0.0  | 16.2   |
| 0.0  | 12.3   |
| 0.0  | 7.9    |
| 0.0  | 19.3   |
| 0.0  | 5.1    |

|      |      |
|------|------|
| 0.92 | 0.72 |
| 0.80 | 0.66 |
| 0.58 | 0.86 |
| 0.62 | 0.79 |
